# Supplementary material for: Tissue-specific transcriptomics and proteomics of a filarial nematode and its Wolbachia endosymbiont
Source: PubMed Central journal article supplement (PMC4642636; doi:10.1186/s12864-015-2083-2), 2015-11-11
Supplement: 12864_2015_2083_MOESM13_ESM.pdf [file 12864_2015_2083_MOESM13_ESM.pdf]

FU FH FBW MH FI MS

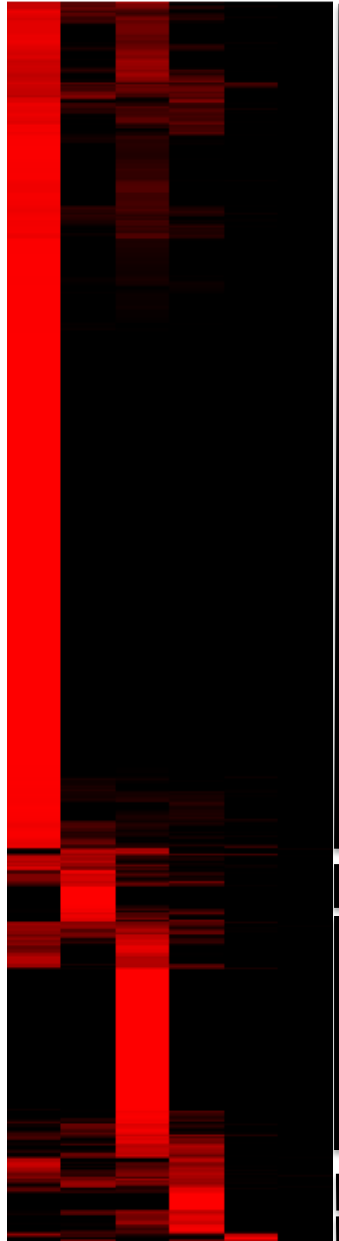

FU-associated

FH-associated

FBW-associated

MH-associated  
FI-associated
